# Supplementary material for: Accumulation of Long-Chain Glycosphingolipids during Aging Is Prevented by Caloric Restriction
Source: PLOS journal article supplement (doi:10.1371/journal.pone.0020411), 2011-06-08
Supplement: S2 (10.1371/journal.pone.0020411.s002) [file journal.pone.0020411.s002]

## **SUPPORTING INFORMATION S2:**

**S2 Figure Legend: Caloric restriction regulation of renal sphingolipid levels.** The sphingolipid profile was measured in 9 and 17 month old CR mice and age-matched littermate AL mice all obtained from the NIH NIA calorically-restricted mouse colony. Lipid data were normalized to total protein and the mean value calculated for each group. Data are expressed as a  $\text{Log}_2$  of the ratio of the CR mean to the age-matched littermate AL mean for (a) sphingomyelin, (b) ceramide, (c) hexosylceramide, and (d) lactosylceramide. LC refers to long-chain species ( $\text{C}_{14}\text{-C}_{20}$ ) species and VLC to the very long-chain species ( $\text{C}_{22}\text{-C}_{26}$ ).  $n = 5\text{-}6$ .

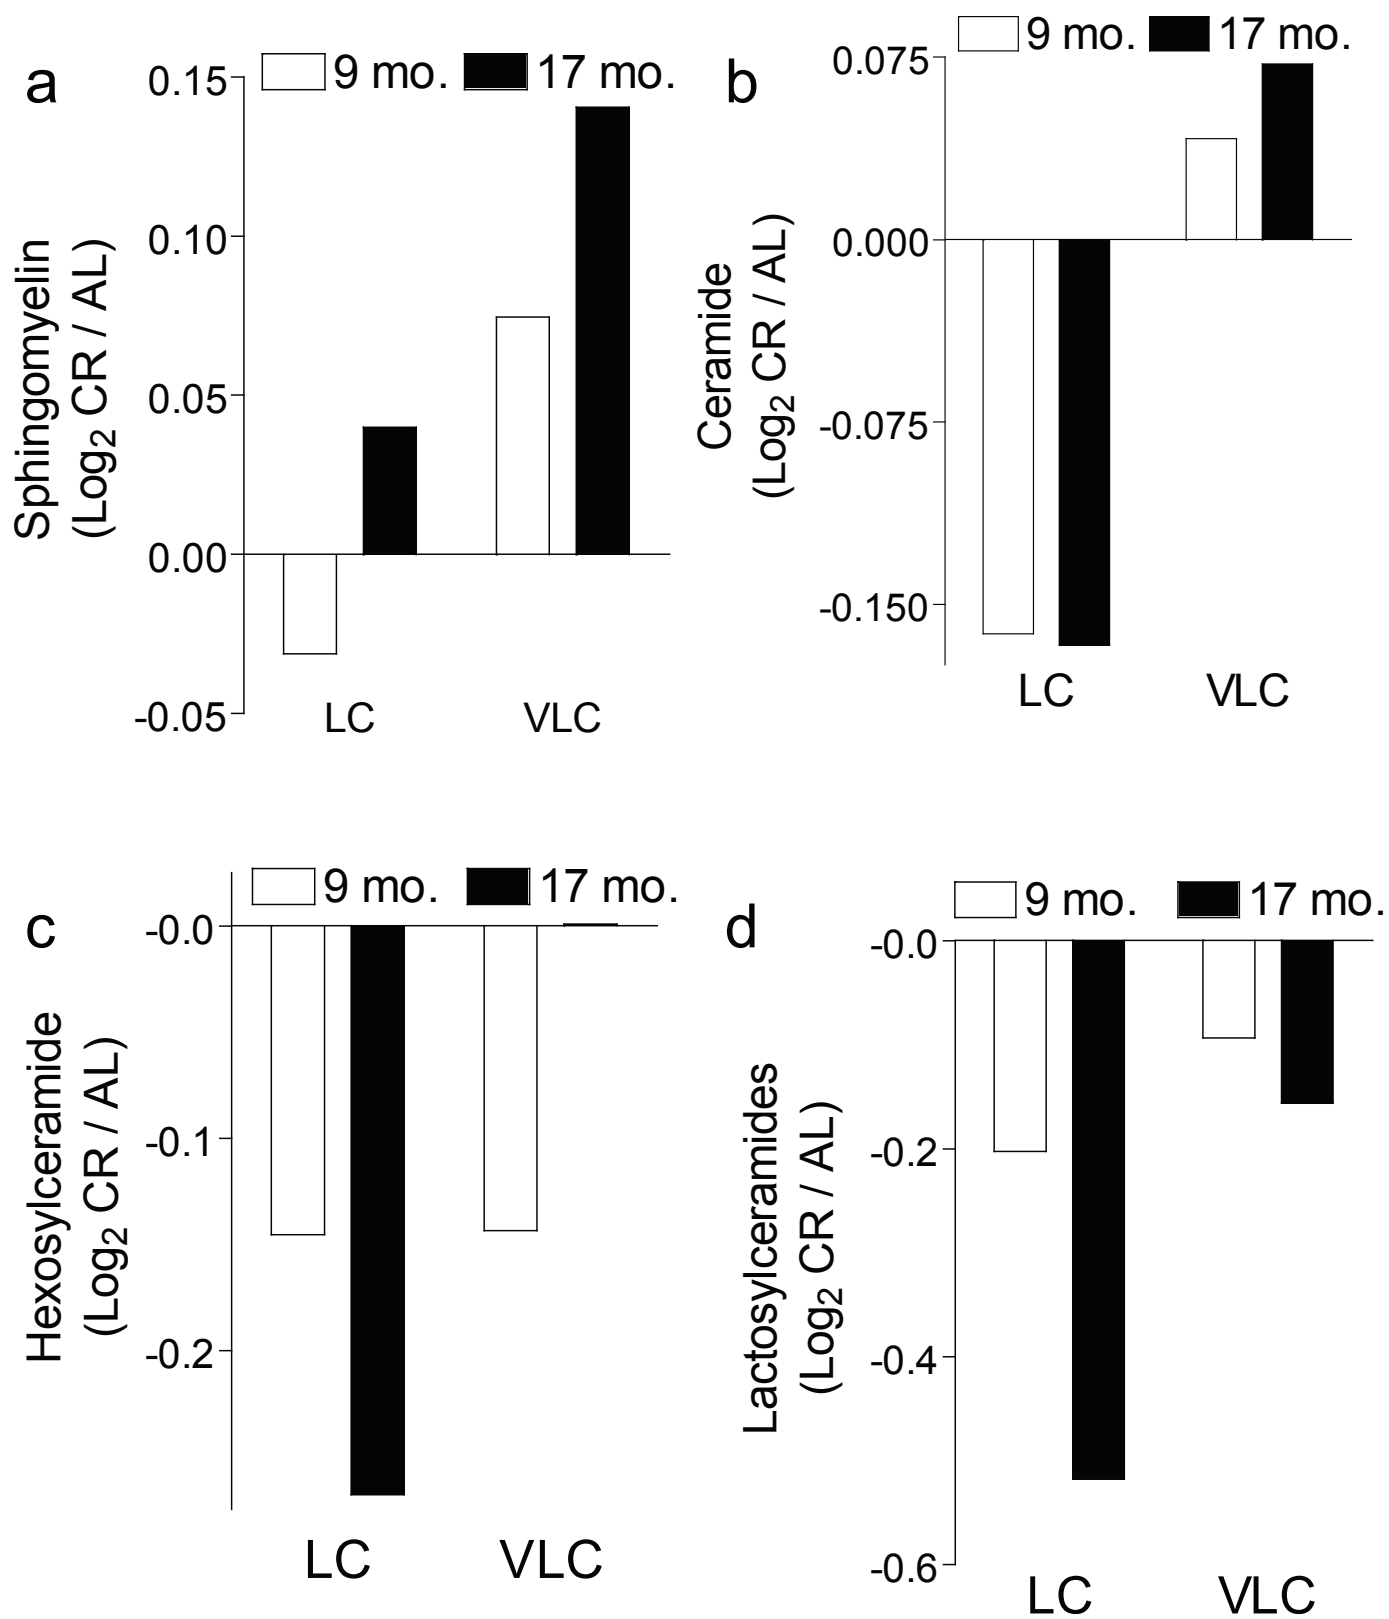

Supplemental Figure 2
